# Supplementary material for: Selective fluorescent turn-off sensing of Pd2+ ion: applications as paper strips, polystyrene films, and in cell imaging
Source: Royal Society of Chemistry journal article supplement (doi:10.1039/c6ra27565f), 2017-01-01
Supplement: c6ra27565f1.pdf [file c6ra27565f1.pdf]

## **Electronic Supplementary Information**

For the Manuscript Entitled

### **Selective fluorescent turn-off sensing of Pd<sup>2+</sup> ion: Applications as paper strips, polystyrene films, and in cell imaging**

Pramod Kumar, Vijay Kumar, Rajeev Gupta\*

Department of Chemistry, University of Delhi, Delhi – 110 007

## List of Figures

**Figure S1.** FTIR spectrum of probe L1.

**Figure S2.** FTIR spectrum of probe L2.

**Figure S2.** FTIR spectrum of probe L3.

**Figure S2.** FTIR spectrum of probe L4.

**Figure S5.**  $^1\text{H}$  NMR spectrum of probe L1 in DMSO- $d_6$  where \* represents the residual solvent peak(s).

**Figure S6.**  $^{13}\text{C}$  NMR spectrum of probe L1 in DMSO- $d_6$  where \* represents the residual solvent peak(s).

**Figure S7.**  $^1\text{H}$  NMR spectrum of probe L2 in DMSO- $d_6$  where \* represents the residual solvent peak(s).

**Figure S8.**  $^{13}\text{C}$  NMR spectrum of probe L2 in DMSO- $d_6$  where \* represents the residual solvent peak(s).

**Figure S9.**  $^1\text{H}$  NMR spectrum of probe L3 in DMSO- $d_6$  where \* represents the residual solvent peak(s).

**Figure S10.**  $^{13}\text{C}$  NMR spectrum of probe L3 in DMSO- $d_6$  where \* represents the residual solvent peak(s).

**Figure S11.**  $^1\text{H}$  NMR spectrum of probe L4 in DMSO- $d_6$  where \* represents the residual solvent peak(s).

**Figure S12.**  $^{13}\text{C}$  NMR spectrum of probe L4 in DMSO- $d_6$  where \* represents the residual solvent peak(s).

**Figure S13.** (a) UV-visible spectra of probes L1- L4(50  $\mu\text{M}$ ) in dimethylformamide (DMF) solution. (b) Emission spectra of L1-L4 (50  $\mu\text{M}$ ) in HEPES buffer containing 1% DMF (10 mM,  $\text{pH} = 7.2$ ).

**Figure S14.** (a) Emission spectra of probe L1 (50  $\mu\text{M}$ ) in HEPES buffer containing 1% DMF (10 mM,  $\text{pH} = 7.2$ ) and after its interaction with assorted metal ions (0-250  $\mu\text{M}$ ). (b) Bar diagram exhibiting change in emission intensity at 455 nm of L1 (50  $\mu\text{M}$ ) after the addition of assorted metal ions (0-250  $\mu\text{M}$ ).

**Figure S15.** (a) Emission spectra of probe L2(50  $\mu\text{M}$ ) in HEPES buffer containing 1% DMF (10 mM,  $\text{pH} = 7.2$ ) and after its interaction with assorted metal ions (0-250  $\mu\text{M}$ ). (b) Bar diagram

exhibiting change in emission intensity at 460 nm of L2 (50  $\mu\text{M}$ ) after the addition of assorted metal ions (0-250  $\mu\text{M}$ ).

**Figure S16.** Bar diagram exhibiting relative quenching of probes L1-L4 (50  $\mu\text{M}$ ) after interaction with  $\text{Pd}^{2+}$  ion (250  $\mu\text{M}$ ).

**Figure S17.** Determination of detection limit of probes (a) L3 (50  $\mu\text{M}$ ) and (b) L4 (50  $\mu\text{M}$ ) in HEPES buffer containing 1% DMF (10 mM,  $\text{pH} = 7.2$ ) towards  $\text{Pd}^{2+}$  ion (Concentration was linear from 0 - 100  $\mu\text{M}$ ).

**Figure S18.** Emission spectra of probes L3 (a) and L4 (b) (50  $\mu\text{M}$ ) in HEPES buffer containing 1% DMF (10 mM,  $\text{pH} = 7.2$ ) and after its interaction with different palladium salts (250  $\mu\text{M}$ , 5 equivalents).

**Figure S19 (a)** Job's plot for probes L3 and L4 with  $\text{Pd}^{2+}$  ion in HEPES buffer containing 1% DMF (10 mM,  $\text{pH} = 7.2$ ) (Total concentration of probes L3 or L4 and  $\text{Pd}^{2+}$  ion were maintained at 100  $\mu\text{M}$ ).

**Figure S20** Representative Benesi-Hildebrand plots showing reciprocal of change in emission intensity of probes L3 and L4 vs. reciprocal of concentration of  $\text{Pd}^{2+}$  ion in HEPES buffer containing 1% DMF (10 mM,  $\text{pH} = 7.2$ ).

**Figure S21.** Change in absorbance of probes (a) L3 (25  $\mu\text{M}$ ) and (b) L4 (25  $\mu\text{M}$ ) with  $\text{Pd}^{2+}$  ion (0-125  $\mu\text{M}$ ) in HEPES buffer containing 1% DMF (10 mM,  $\text{pH} = 7.2$ ).

**Figure S22.** FTIR spectrum of complex **1**.

**Figure S23.**  $^1\text{H}$  NMR spectrum of complex **1** in  $\text{DMSO-d}_6$  where \* represents the residual solvent peak(s).

**Figure S24.** Emission spectra of probe L3, in-situ formed Pd-L3 and isolated complex **1** (50  $\mu\text{M}$ ) in HEPES buffer containing 1% DMF (10 mM,  $\text{pH} = 7.2$ ).

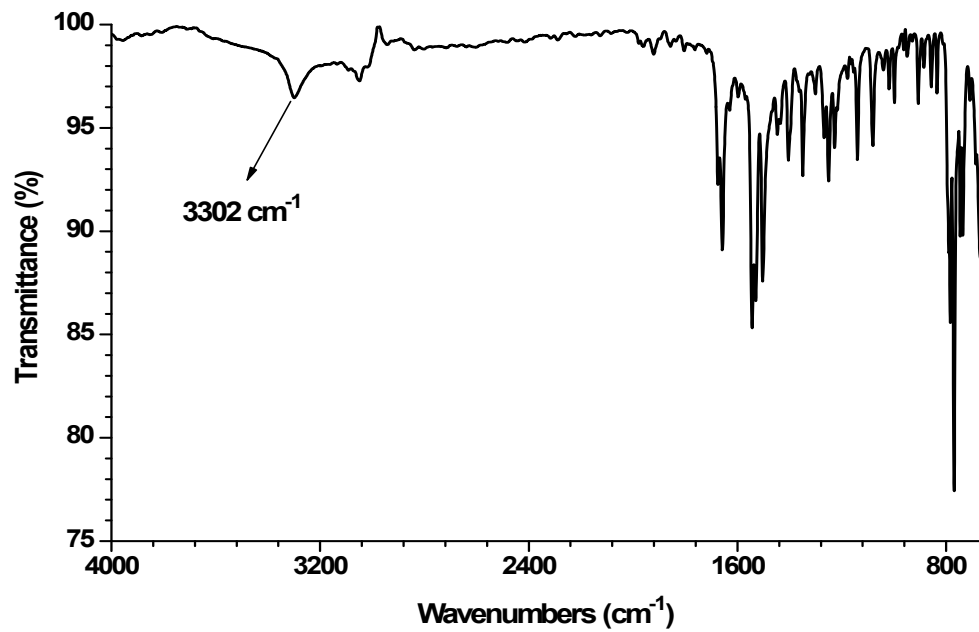

Figure S1. FTIR spectrum of probe L1.

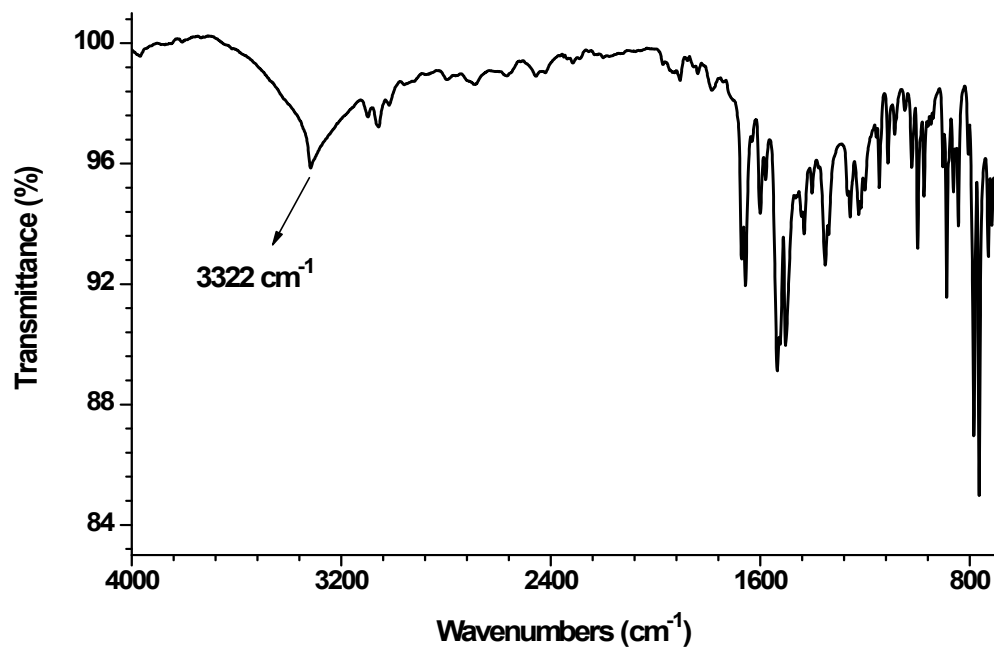

Figure S2. FTIR spectrum of probe L2.

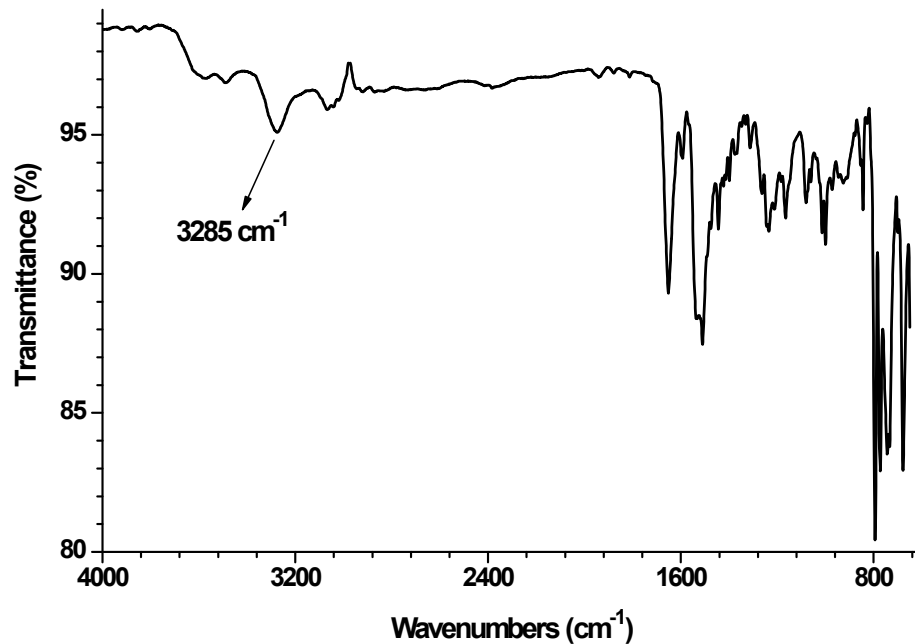

Figure S3. FTIR spectrum of probe L3.

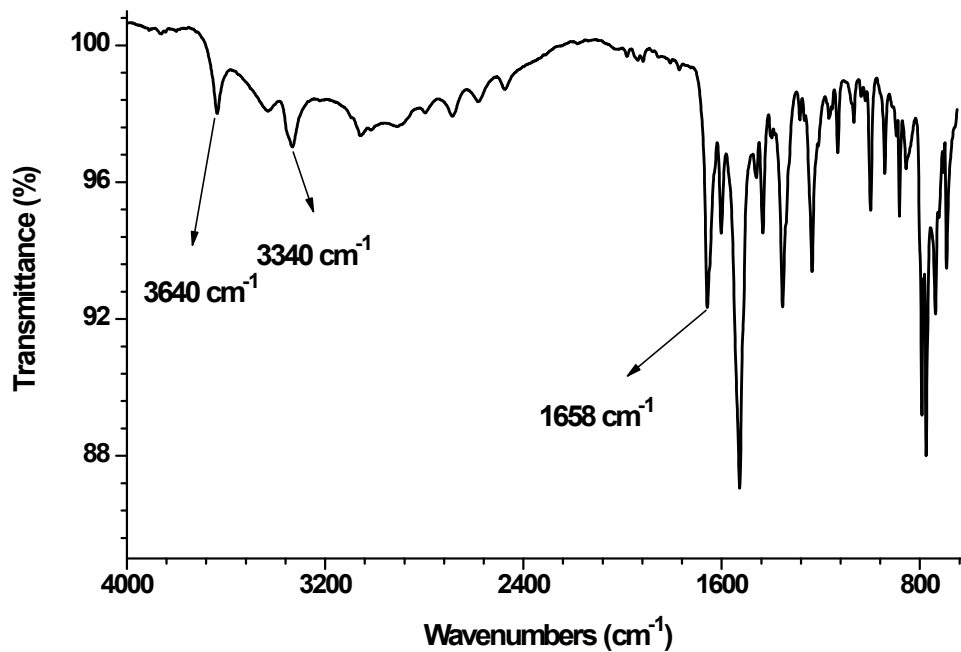

Figure S4. FTIR spectrum of probe L4.

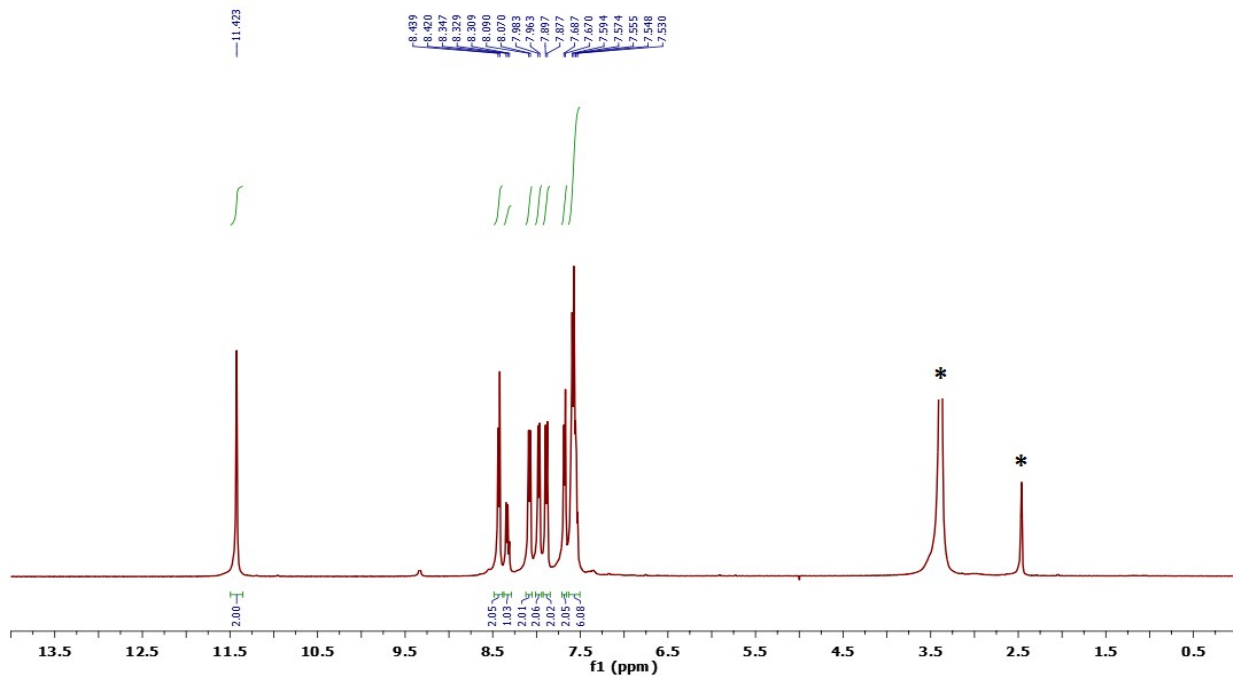

**Figure S5.**  $^1\text{H}$  NMR spectrum of probe L1 in  $\text{DMSO-d}_6$  where \* represents the residual solvent peak(s).

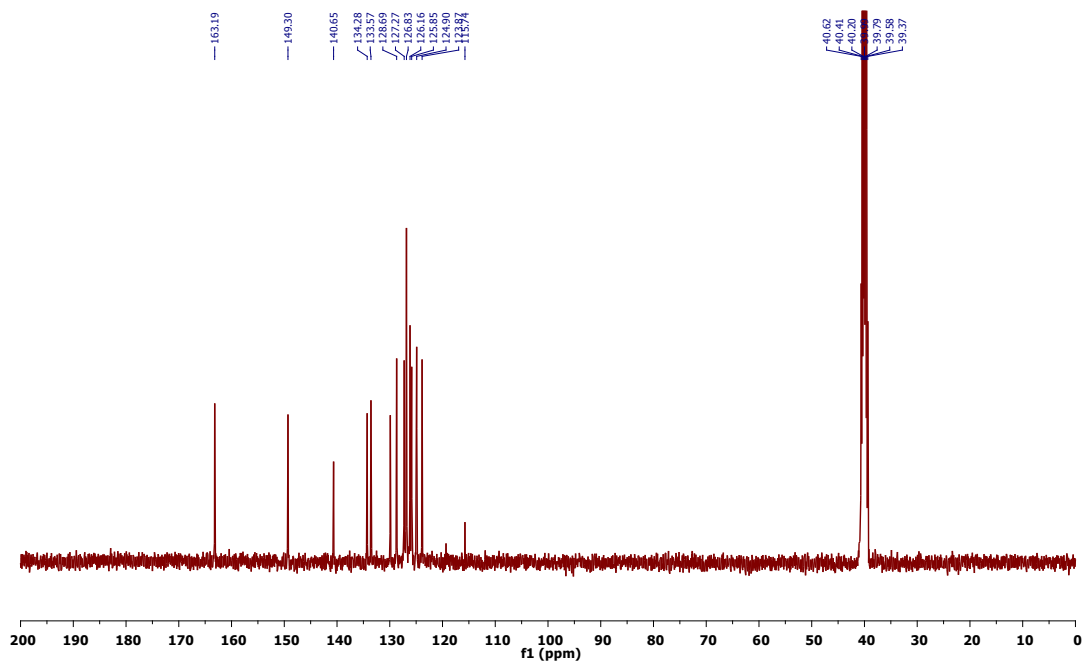

**Figure S6.**  $^{13}\text{C}$  NMR spectrum of probe L1 in  $\text{DMSO-d}_6$  where \* represents the residual solvent peak(s).

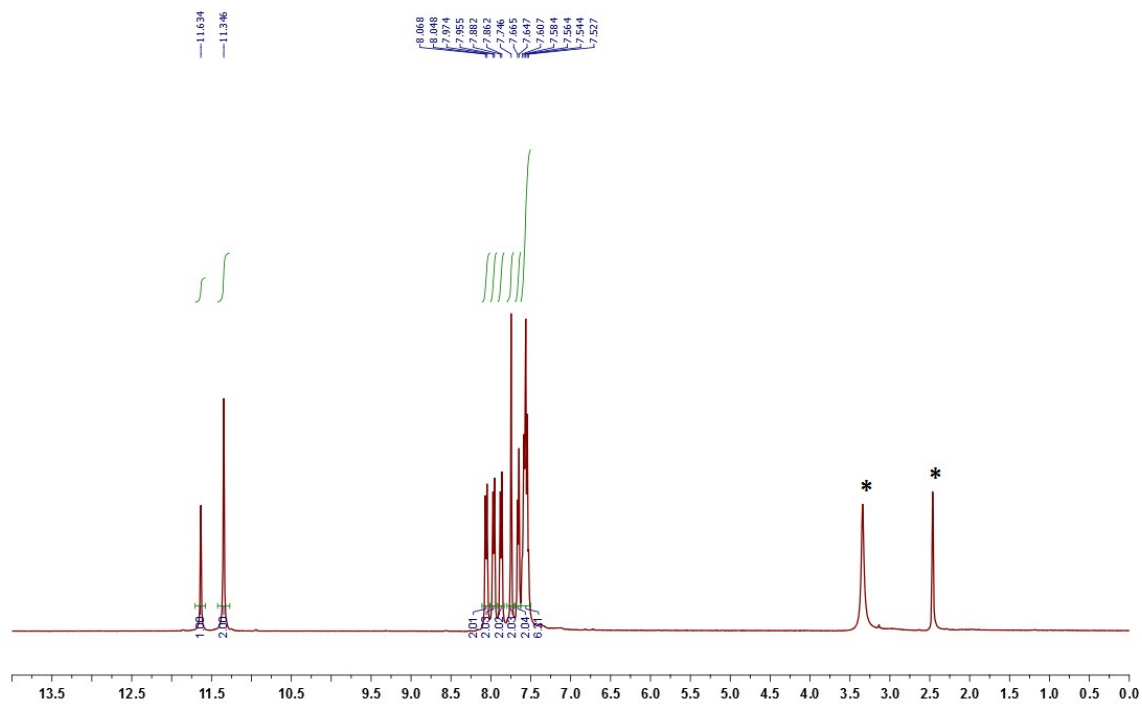

**Figure S7.**  $^1\text{H}$  NMR spectrum of probe L2 in  $\text{DMSO-d}_6$  where \* represents the residual solvent peak(s).

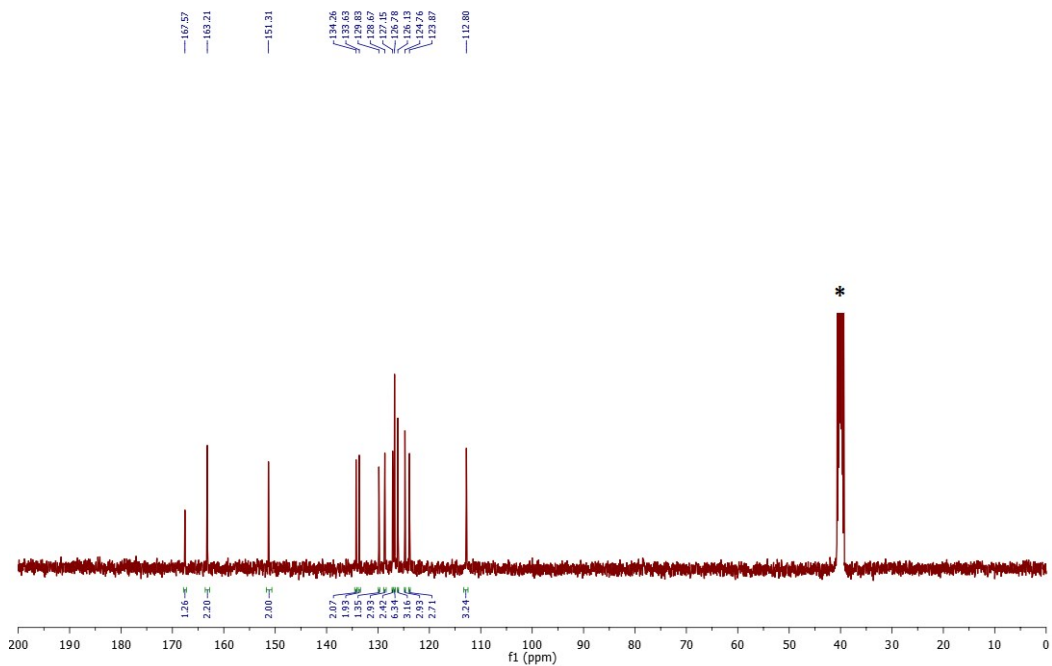

**Figure S8.**  $^{13}\text{C}$  NMR spectrum of probe L2 in  $\text{DMSO-d}_6$  where \* represents the residual solvent peak(s).

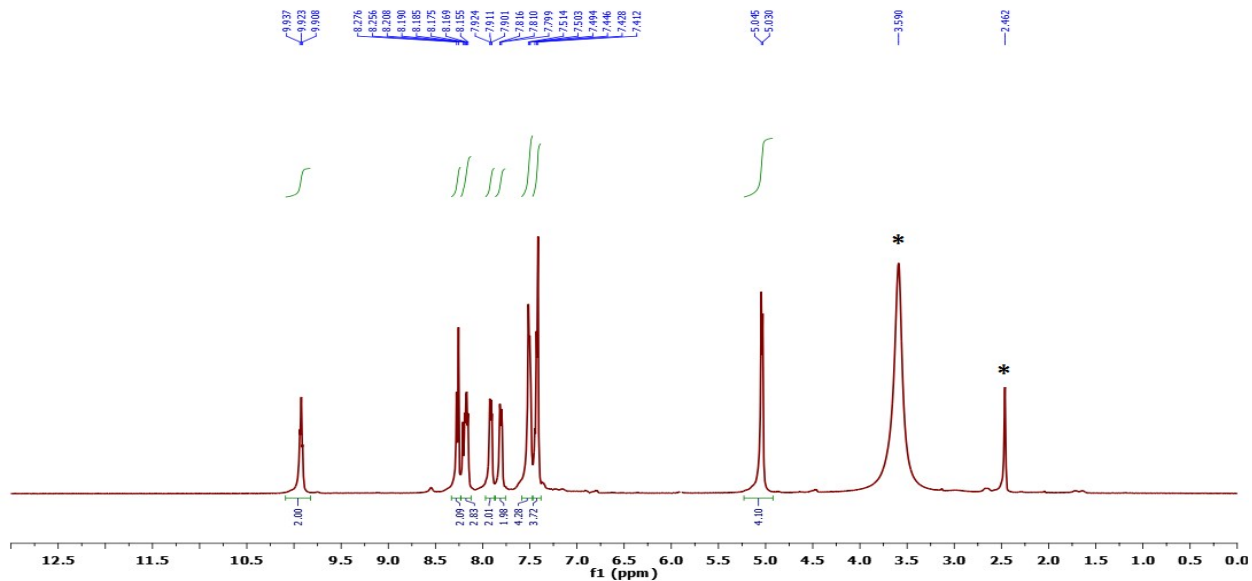

**Figure S9.**  $^1\text{H}$  NMR spectrum of probe L3 in  $\text{DMSO-d}_6$  where \* represents the residual solvent peak(s).

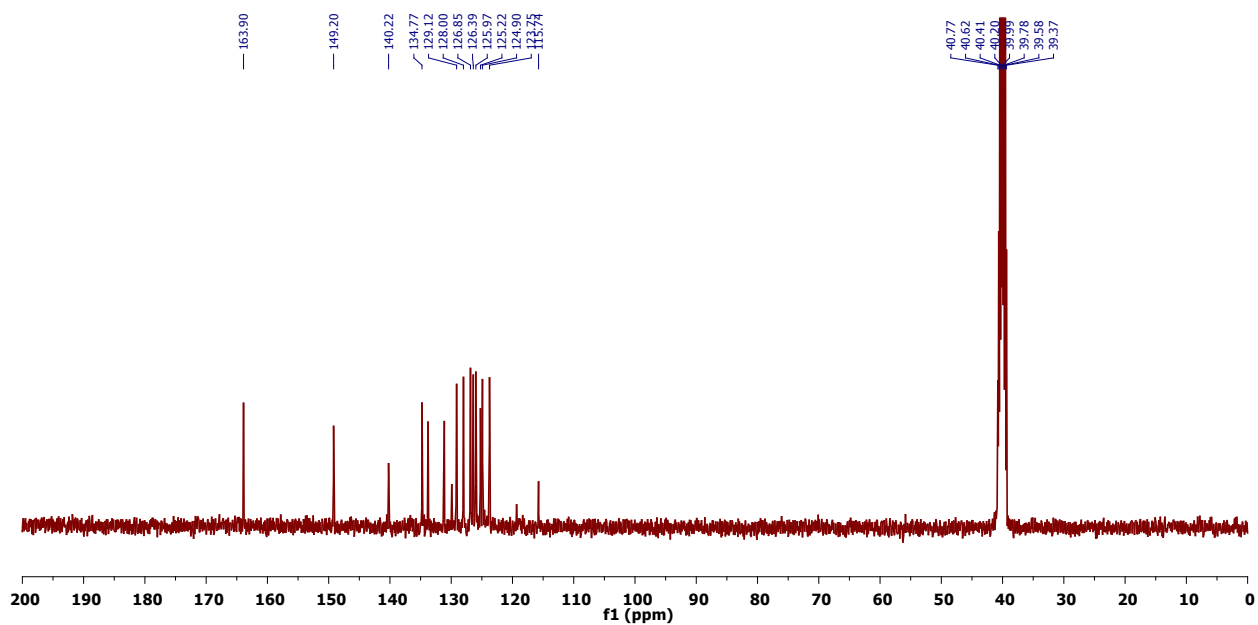

**Figure S10.**  $^{13}\text{C}$  NMR spectrum of probe L3 in  $\text{DMSO-d}_6$  where \* represents the residual solvent peak(s).



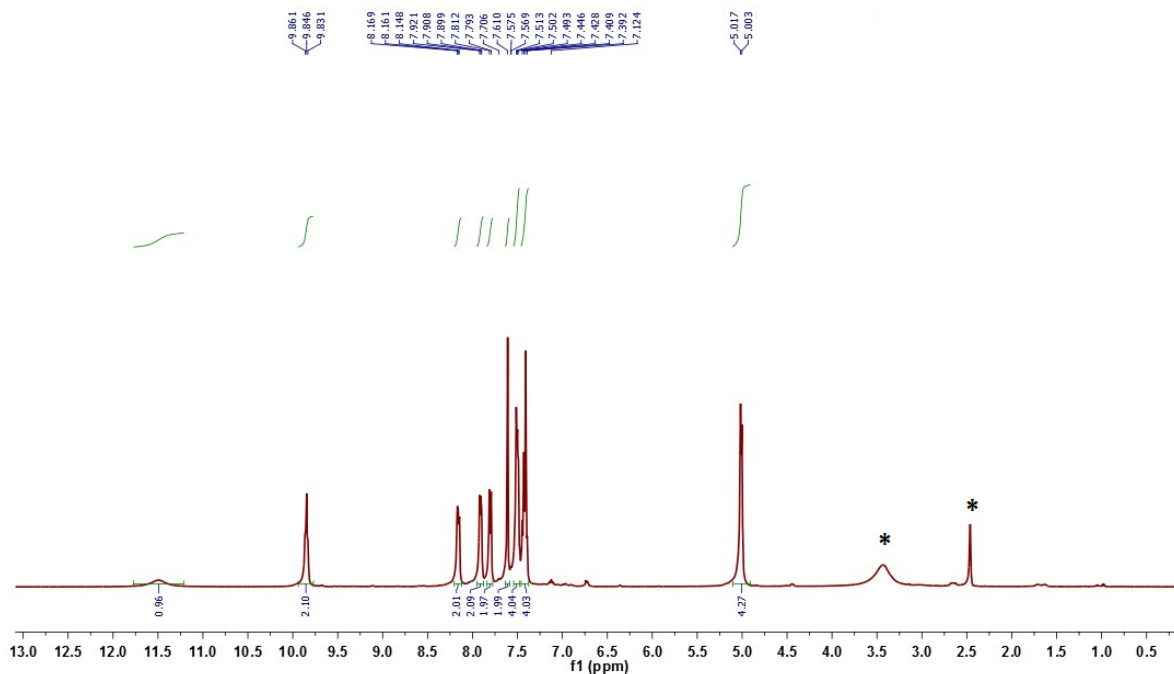

**Figure S11.**  $^1\text{H}$  NMR spectrum of probe L4 in  $\text{DMSO-d}_6$  where \* represents the residual solvent peak(s).

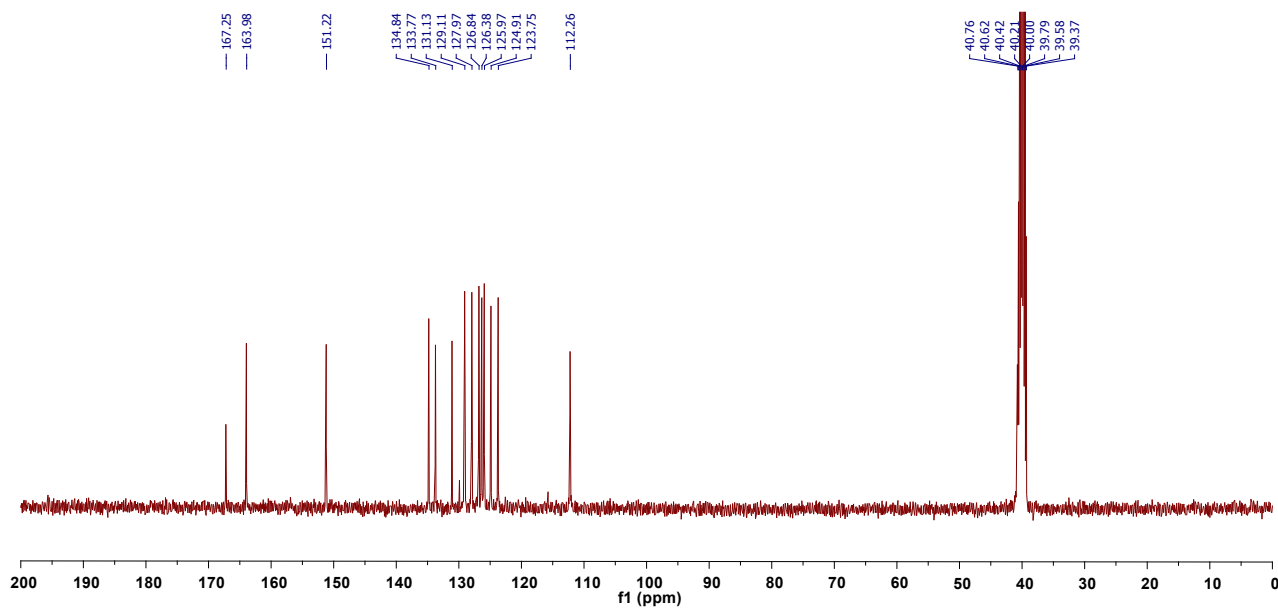

**Figure S12.**  $^{13}\text{C}$  NMR spectrum of probe L4 in  $\text{DMSO-d}_6$  where \* represents the residual solvent peak(s).

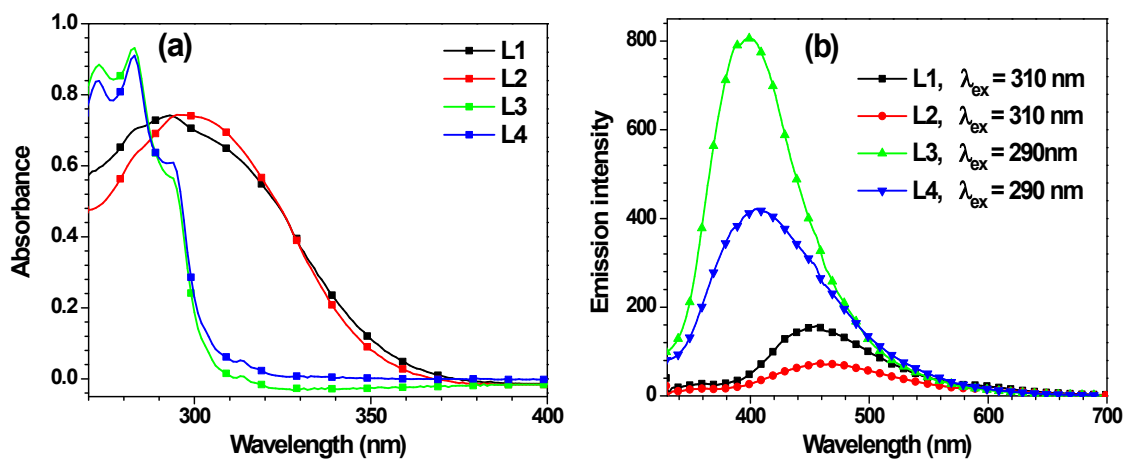

**Figure S13.** (a) UV-visible spectra of probes L1- L4 (50  $\mu\text{M}$ ) in dimethylformamide (DMF) solution. (b) Emission spectra of L1-L4 (50  $\mu\text{M}$ ) in HEPES buffer containing 1% DMF (10 mM,  $\text{pH} = 7.2$ ).

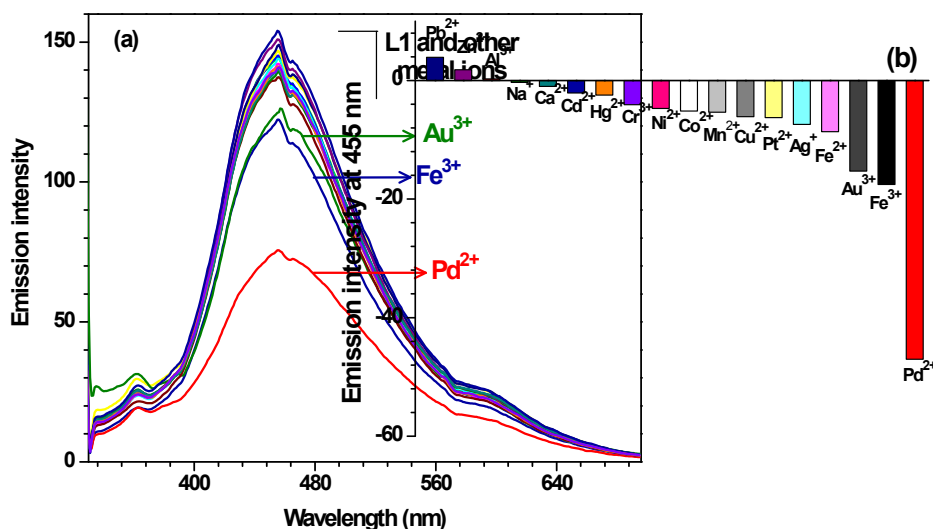

**Figure S14.** (a) Emission spectra of probe L1(50  $\mu\text{M}$ ) in HEPES buffer containing 1% DMF (10 mM,  $\text{pH} = 7.2$ ) and after its interaction with assorted metal ions (0-250  $\mu\text{M}$ ). (b) Bar diagram exhibiting change in emission intensity at 455 nm of L1 (50  $\mu\text{M}$ ) after the addition of assorted metal ions (0-250  $\mu\text{M}$ ).

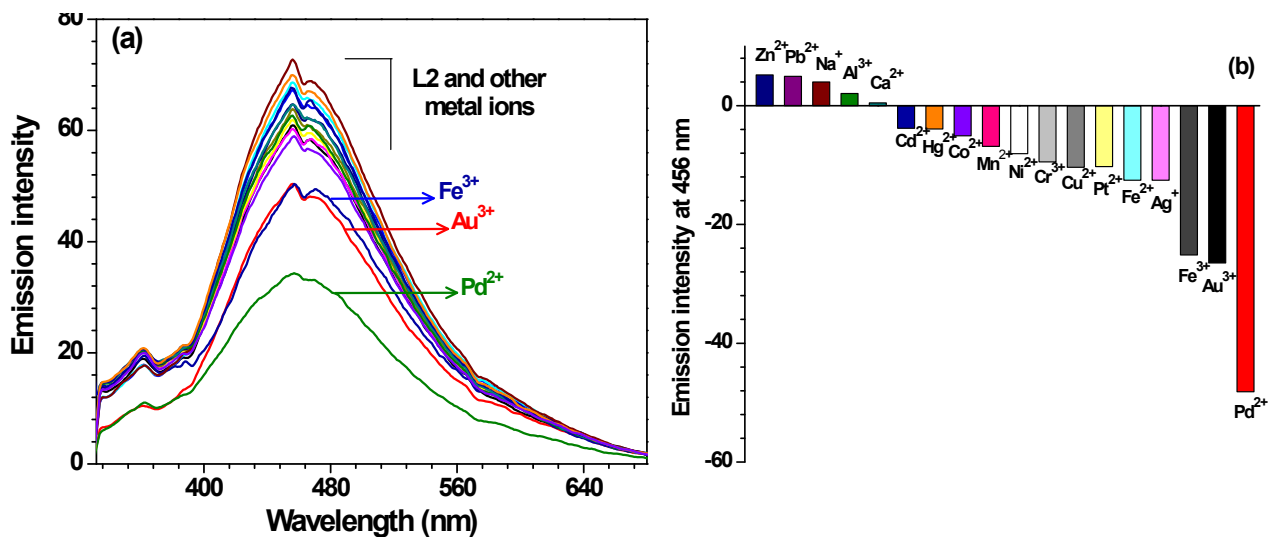

**Figure S15.** (a) Emission spectra of probe L2 (50  $\mu\text{M}$ ) in HEPES buffer containing 1% DMF (10 mM,  $\text{pH} = 7.2$ ) and after its interaction with assorted metal ions (0-250  $\mu\text{M}$ ). (b) Bar diagram exhibiting change in emission intensity at 460 nm of L2 (50  $\mu\text{M}$ ) after the addition of assorted metal ions (0-250  $\mu\text{M}$ ).

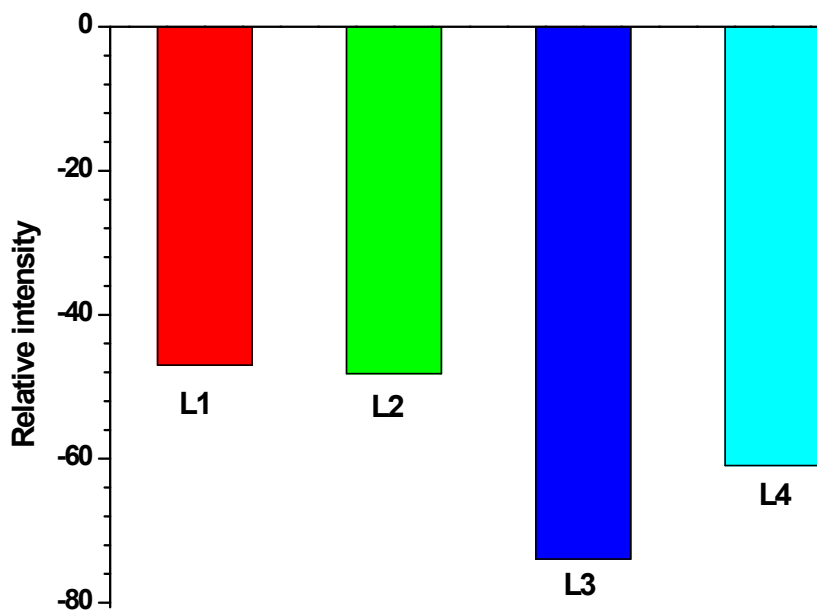

**Figure S16.** Bar diagram exhibiting relative quenching of probes L1-L4 (50  $\mu\text{M}$ ) after interaction with  $\text{Pd}^{2+}$  ion (250  $\mu\text{M}$ ).

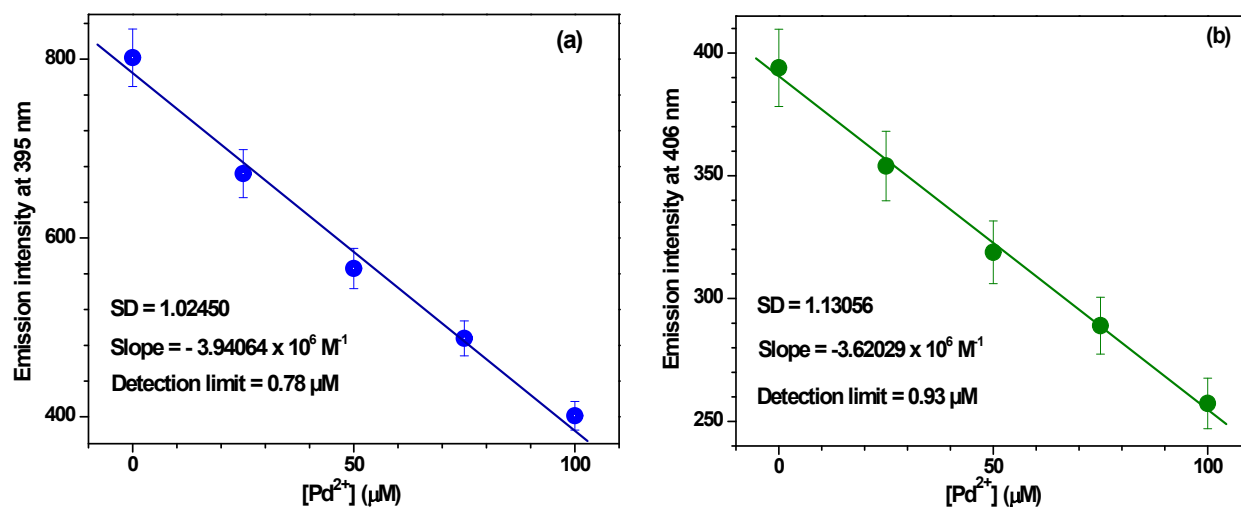

**Figure S17.** Determination of detection limit of probes (a) L3 (50 μM) and (b) L4 (50 μM) in HEPES buffer containing 1% DMF (10 mM, pH = 7.2) towards Pd<sup>2+</sup> ion (Concentration was linear from 0 - 100 μM).

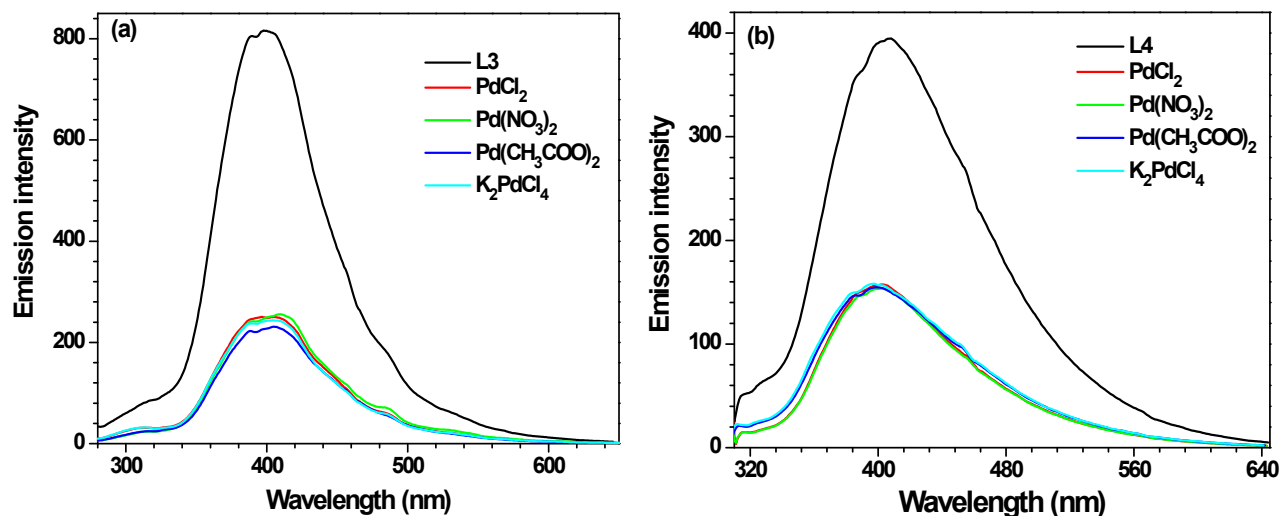

**Figure S18.** Emission spectra of probes L3 (a) and L4 (b) (50 μM) in HEPES buffer containing 1% DMF (10 mM, pH = 7.2) and after its interaction with different palladium salts (250 μM, 5 equivalents).

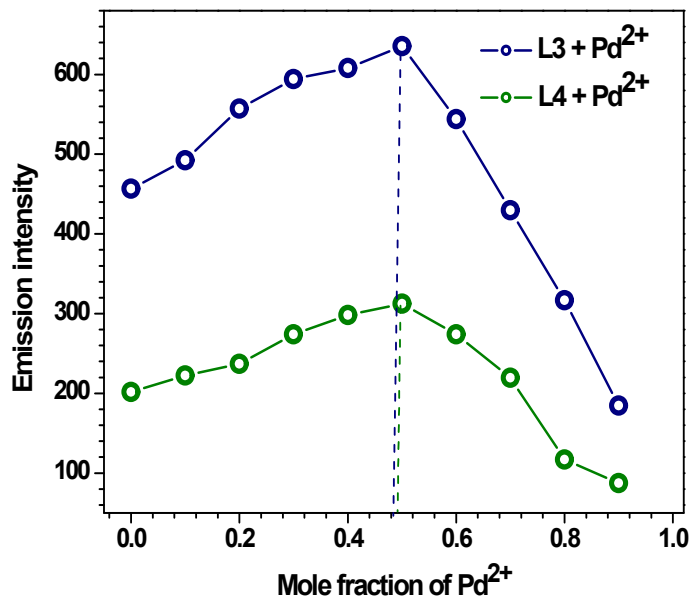

**FigureS19. (a)** Job's plot for probes L3 and L4 with Pd<sup>2+</sup> ion in HEPES buffer containing 1% DMF (10 mM, pH = 7.2) (Total concentration of probes L3 or L4 and Pd<sup>2+</sup> were maintained at 100 μM).

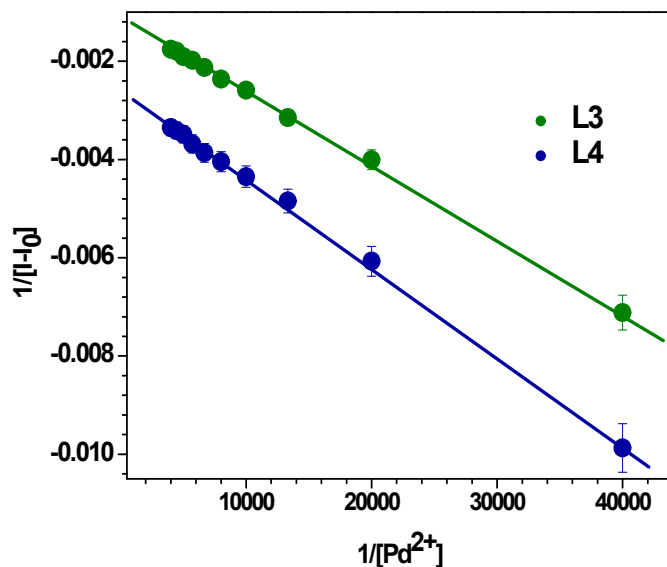

**Figure S20** Representative Benesi-Hildebrand plots showing reciprocal of change in emission intensity of probes L3 and L4 vs. reciprocal of concentration of Pd<sup>2+</sup> ion in HEPES buffer containing 1% DMF (10 mM, pH = 7.2).

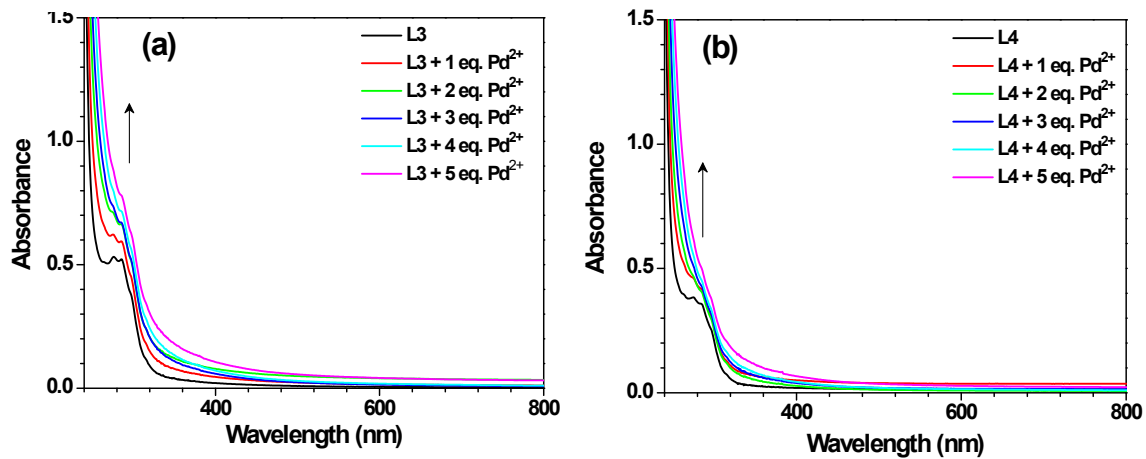

**Figure S21.** Change in absorbance of probes (a) L3(25  $\mu\text{M}$ ) and (b) L4 (25  $\mu\text{M}$ )with  $\text{Pd}^{2+}$ ion (0-125 $\mu\text{M}$ ) in HEPES buffer containing 1% DMF (10 mM,  $\text{pH} = 7.2$ ).

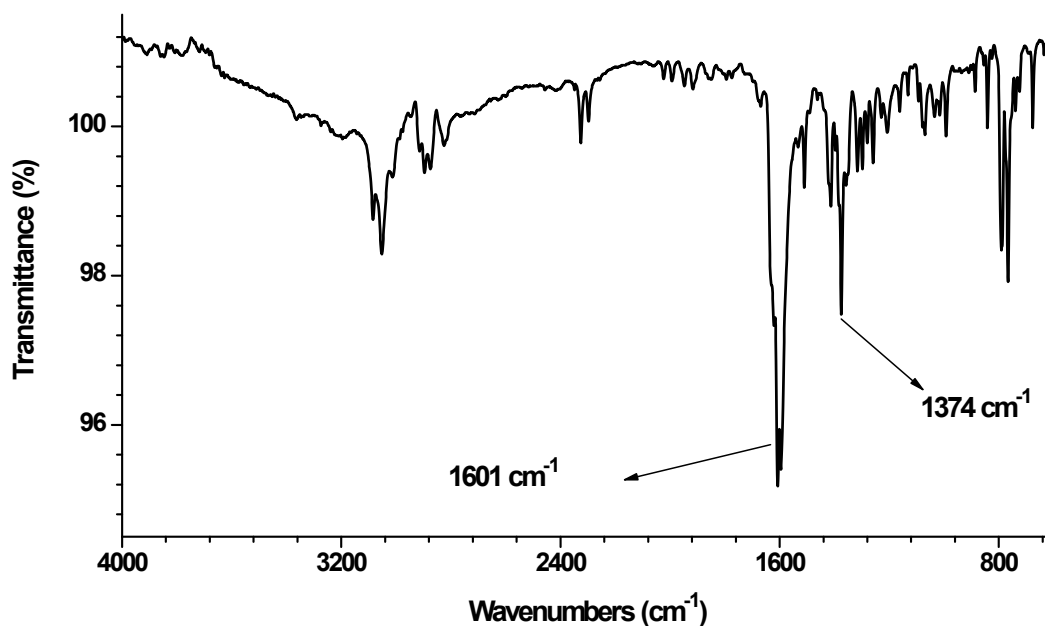

**Figure S22.** FTIR spectrum of complex 1.

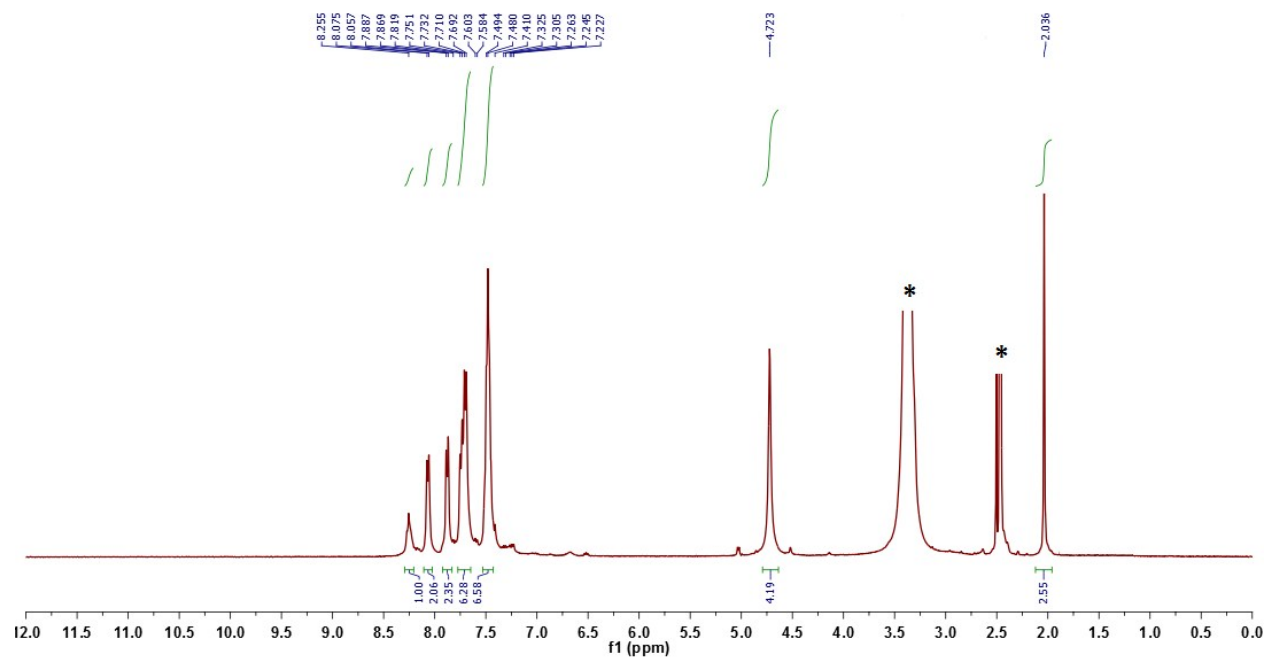

**Figure S23.**  $^1\text{H}$  NMR spectrum of complex **1** in  $\text{DMSO-d}_6$  where \* represents the residual solvent peak(s).

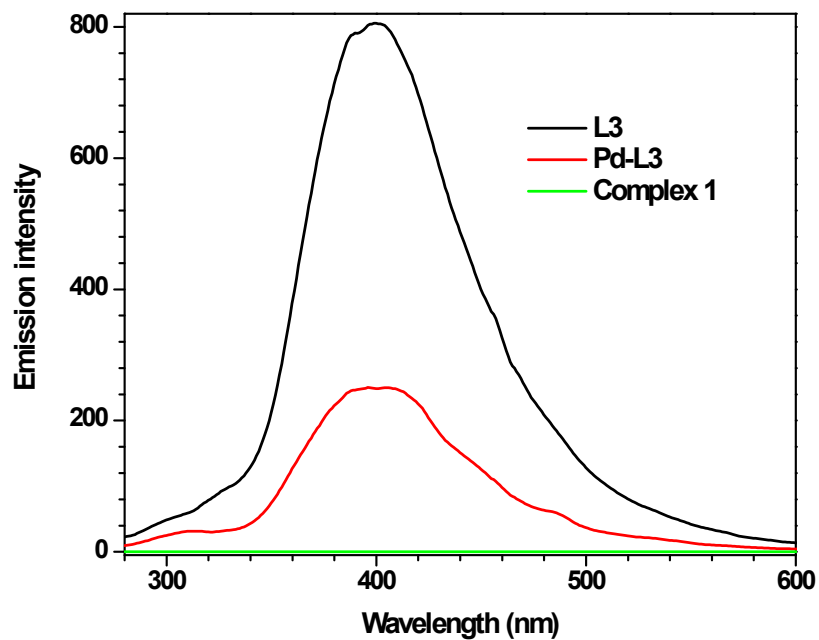

**Figure S24.** Emission spectra of probe L3, in-situ formed Pd-L3 and isolated complex **1** ( $50\ \mu\text{M}$ ) in HEPES buffer containing 1% DMF ( $10\ \text{mM}$ ,  $\text{pH} = 7.2$ ).
